# Supplementary material
Source: MDPI journal article supplement (https://www.mdpi.com/2076-3417/12/1/427)

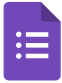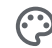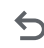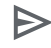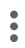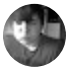

# IBACSA

[Questions](#)[Responses](#)

4

[Settings](#)

## Section 1 of 9

# IBACSA

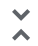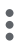

IBACSA er et interaktivt værktøj til bygningsautomations- og kontrolsystemer revision og evaluering af 'smartness'. Det er udviklet til at kunne sammenligne systemerne (varme, køling, ventilation, lys osv.) i den undersøgte bygning i forhold til europæiske standarder.

For den specifikke bygning der svares til, skal der svares hvordan størstedelen af systemet fungerer. Det er f.eks. ikke sikkert at hele bygningen har samme type ventilation, men hvis 60% af bygningen har én type system, så er det det svaret skal være. Under "Other" kan en dybere forklaring af hvordan systemet fungerer beskrives, samt opdeling hvis den er markant. Dette er ikke nødvendigt.

Det kræver ikke detaljeret informationer om direkte forbrug el. lign., men nærmere en forståelse for hvordan systemet er sat sammen og fungerer.

Spørgeskemaet er delt ind i 8 dele, varme, varmt vand, køling, ventilation, lys, dynamisk klimaskærm, electricitet og overvågning/kontrol. Det forventes ikke at dem som får dette spørgeskema tilsendt kan svare på alle spørgsmål, og derfor er der mulighed for at vælge "Ikke mit område" som svar.

Hvert spørgsmål har en række niveauer (levels), som definerer hvor automatiseret systemet er. F.eks. indenfor lys, vil et lavt niveau være manuel tænd/sluk af lyset, hvorimod et højt niveau vil være lys med bevægelsessensor.

Hvilken bygning svares der på?

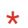

Short-answer text

Hvordan kan du kontaktes hvis der er yderligere spørgsmål? (skriv mail/tlf. el. lign)

Short-answer text

After section 1 Continue to next section

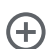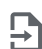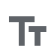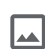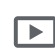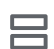

## Section 2 of 9

# Varme system

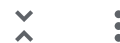

Dette afsnit er udelukkende omkring opvarmning af rum. Opvarmning gennem ventilation, skal ikke bruges til at svare på disse spørgsmål.

## 1 Kontrol af varmeforsyning \*

- ☐ Level 0: Ingen automatisk kontrol af rumtemperatur
- ☐ Level 1: Central automatisk kontrol af rumtemperatur (f.eks. centralt termostat). Kontrollen afænger...
- ☐ Level 2: Rum er kontrolleret individuelt kontrolleret med termostatventiler eller elektroniske systeme...
- ☐ Level 3: Samme som level 2, inklusiv kommunikation mellem til
- ☐ Level 4: Samme som level 3, inklusiv tilstedeværelsessensor (f.eks. bevægelsescensor)
- ☐ Ved ikke / Har ikke informationer nok
- ☐ Ikke mit område
- ☐ Other...

## 2 TABS (Termisk aktiveret bygningssystem) kontrol af varmesystem \*

- ☐ Level 0: Ingen automatisk kontrol af rumtemperatur
- ☐ Level 1: Central automatisk kontrol. Kontrollen afhænger af filtreret udendørs temperatur
- ☐ Level 2: Avanceret central automatisk kontrol. Avanceret kontrol opnår en optimal selvregulerende s...
- ☐ Level 3: Samme som level 2, inklusiv intermitterende drift kontrol med varierende pumpe system og ...
- ☐ Ved ikke / Har ikke informationer nok
- ☐ Ikke mit område

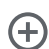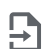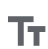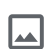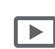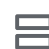

### 3 Temperaturregulering af varmevæske \*

- ☐ Level 0: Ingen automatisk kontrol. Væsketemperaturen er ikke kontrolleret.
- ☐ Level 1: Udendørs temperatur/vejr-bestemt kontrol. Væsketemperaturen er kontrolleret afhængig af ...
- ☐ Level 2: Forbrug-baseret kontrol. Væsketemperaturen er kontrolleret baseret på forbrug og varmekon...
- ☐ Ved ikke / Har ikke informationer nok
- ☐ Ikke mit område
- ☐ Other...

### 4 Kontrol af distributionspumper i varmenetværker \*

- ☐ Level 0: Ingen automatisk kontrol. Distributionspumperne er ikke kontrolleret.
- ☐ Level 1: Automatisk tænd/Sluk kontrol. Når de er tændt, kører pumperne maksimalt uden kontrol.
- ☐ Level 2: Kontrol i flere trin. Hastigheden på pumperne er kontrolleret i flere trin.
- ☐ Level 3: Variabel hastighedskontrol, afhængig af flere stadier i systemer.
- ☐ Ved ikke / Har ikke informationer nok
- ☐ Ikke mit område
- ☐ Other...

### 5 Varme distribution kontrol \*

- ☐ Level 0: Ingen automatisk kontrol.
- ☐ Level 1: Automatisk timebaseret kontrol. Typisk baseret på nominelle driftstimer.

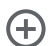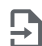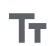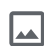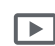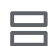

- ☐ Level 3: Automatisk kontrol baseret på forbrugerens efterspørgsel.
- ☐ Ved ikke / Har ikke informationer nok
- ☐ Ikke mit område
- ☐ Other...

#### 6 Kontrol af termisk lagringsfunktion \*

- ☐ Level 0: Kontinuerlig lager operation.
- ☐ Level 1: Time-planlagt lager operation. Lagringen er baseret på sensor indikation.
- ☐ Level 2: Lager baseret på belastningsforudsigning; baseret på forbrugerens efterspørgsel.
- ☐ Ved ikke / Har ikke informationer nok
- ☐ Ikke mit område
- ☐ Other...

#### 7 Kontrol af varmegenerator \*

- ☐ Level 0: Tænd/sluk kontrol.
- ☐ Level 1: Kontrol afhængig af udendørs temperatur. Temperaturen er sat efter de udendørstemperat...
- ☐ Level 2: Kontrol i flere trin baseret på forbrug eller belastning.
- ☐ Level 3: Variabel kontrol baseret på forbrug eller belastning.
- ☐ Level 4: Samme som level 3, inklusiv eksterne signaler fra netværket omkring f.eks. tariffer, tilgænge...
- ☐ Ved ikke / Har ikke informationer nok
- ☐ Ikke mit område

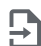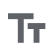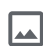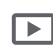

### 8 Sekventering af varmegeneratorer \*

- ☐ Level 0: Prioriteringer er baseret på driftstider, for at optimere vedligeholdelse.
- ☐ Level 1: Kontrol baseret på en fast prioriteringsliste, f.eks. baseret på energieffektivitet.
- ☐ Level 2: Kontrol i forhold til en dynamisk prioriteringsliste, baseret på belastninger, energieffektivitet...
- ☐ Level 3: Samme som level 2, inklusiv en forudsigelse af belastninger, effektiviteter og kapaciteter.
- ☐ Level 4: Samme som level 3, inklusiv eksterne signaler fra netværket omkring f.eks. tariffer, tilgænge...
- ☐ Ved ikke / Har ikke informationer nok
- ☐ Ikke mit område
- ☐ Other...

### 9 Rapportinformation vedrørende varmesystemets præstation \*

- ☐ Level 0: Ingen rapportering.
- ☐ Level 1: Central- eller fjern-rapportering af nuværende situation (f.eks. Nøgletal om præstation indikat...
- ☐ Level 2: Samme som level 1, inklusiv rapportering af historisk data.
- ☐ Level 3: Samme som level 2, inklusiv prognoser om præstation evaluering (f.eks. indeklima eller ene...
- ☐ Level 4: Samme som level 3, inklusiv fejlfinding og forebyggende vedligeholdelse.
- ☐ Ved ikke / Har ikke informationer nok
- ☐ Ikke mit område
- ☐ Other...

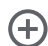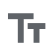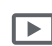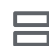

Level 0: Ikke implementeret

- ☐ Level 1: Detaljeret overvågning af mindre end 50% af relevante varmekonsum.
- ☐ Level 2: Detaljeret overvågning af 50-90% af relevante varmekonsum.
- ☐ Ved ikke / Har ikke informationer nok
- ☐ Ikke mit område
- ☐ Other...

11 Netværksforbindelse af varmesystemet \*

- ☐ Level 0: Ingen automatisk kontrol
- ☐ Level 1: Planlagt operation
- ☐ Level 2: Selvlærende optimal kontrol
- ☐ Level 3: Optimeret kontrol baseret på eksterne signaler fra netværket (f.eks. tariffer, tilgængelighed ...)
- ☐ Ved ikke / Har ikke informationer nok
- ☐ Ikke mit område
- ☐ Other...

After section 2 Continue to next section

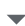

Section 3 of 9

## Varmt vand

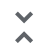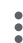

Description (optional)

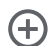

- ☐ Level 0: Automatisk tænd/sluk kontrol
- ☐ Level 1: Samme som level 0, inklusiv planlagt lagring
- ☐ Level 2: Samme som level 1, inklusiv forbrugsbaseret fremløbstemperatur kontrol eller multi-sensor ...
- ☐ Level 3: Automatisk lagringskontrol baseret på eksterne signaler (varme eller elnettet)
- ☐ Ved ikke / Har ikke informationer nok
- ☐ Ikke mit område
- ☐ Other...

## 2 Kontrol af fjernvarmevandslager - temperatur \*

- ☐ Level 0: Manuel kontrol/valg af energikilder som som fodre fjernvarmevandet. Pumpen er tænd/sluk.
- ☐ Level 1: Automatisk kontrol og supplerende opladning. Kontroller brugen af flere energikilder og und...
- ☐ Level 2: Samme som level 1, inklusiv efterspørgselsorienteret udbud eller styring af lagring med fler...
- ☐ Level 3: Samme som level 2, inklusiv retur temperatur kontrol
- ☐ Ved ikke / Har ikke informationer nok
- ☐ Ikke mit område
- ☐ Other...

## 3 Kontrol af fjernvarmevand cirkulationspumpe \*

- ☐ Level 0: Ingen kontrol. Kontinuerlig brug af cirkulationspumpe.
- ☐ Level 1: Kontrol med en tidskoblingsprogram. Tidsplanskontrol tilader skift i stadier.
- ☐ Level 2: Forbrugsbaseret kontrol.

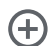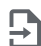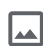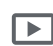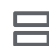

☐ Ikke mit område☐ Other...

#### 4 Sekventering af fjernvarmevands generatorer \*

☐ Level 0: Prioritering er baseret på driftstimer (til optimering af vedligeholdelse)☐ Level 1: Kontrol baseret på en fast prioriteringsliste (ud fra energieffektiviteten)☐ Level 2: Kontrol baseret på en dynamisk prioriteringsliste, ud fra belastning, energieffektiviteten og k...☐ Level: 3: Samme som level 2, inklusiv forudsigelse af forbrug, effektiviteter og kapaciteter.☐ Level 4: Samme som level 3, inklusiv eksterne signaler fra netværket.☐ Ved ikke / Har ikke informationer nok☐ Ikke mit område☐ Other...

#### 5 Rapport information vedrørende fjernvarmevands præstation \*

☐ Level 0: Ingen rapportering☐ Level 1: Central eller fjern-rapportering af nuværende præstation/ydeevne (tal såsom temperaturer og ...☐ Level 2: Samme som level 1, inklusiv rapportering af historisk data.☐ Level 3: Samme som level 2, inklusiv prognoser og præstationsevaluering (f.eks. indeklima)☐ Level 4: Samme som level 3, inklusiv fejlregistrering og forudsigende vedligeholdelse.☐ Ved ikke / Har ikke information nok☐ Ikke mit område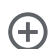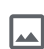



After section 3 Continue to next section ▼

Section 4 of 9

# Køling

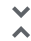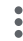

Description (optional)

## 1 Kølesystems kontrol \*

- ☐ Level 0: Ingen automatisk kontrol af rumtemperatur
- ☐ Level 1: Central automatisk kontrol and rumtemperatur (f.eks. central termostat). Kontrol afhænger ...
- ☐ Level 2: Rum er kontrolleret individuelt på termostatiske ventiler eller elektronisk kontrolenheder. Ko...
- ☐ Level 3: Samme som level 2, inklusiv kommunikation mellem kontrolenheder og til BACS (building a...
- ☐ Level 4: Samme som level 3, inklusiv tilstedeværelseskontrol.
- ☐ Ved ikke / Har ikke informationer nok
- ☐ Ikke mit område
- ☐ Other...

## 2 Kølingforsynings kontrol (TABS) \*

- ☐ Level 0: Ingen automatisk kontrol af rumtemperatur
- ☐ Level 1: Central automatisk kontrol. Kontrol afhænger af filtret udendørs temperatur.
- ☐ Level 2: Avanceret central automatisk kontrol, som opnår optimal selvregulerende temperatur.
- ☐ Level 3: Samme som level 2, inklusiv intermitterende præstationskontrol og/eller temperaturfeedbac...

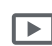

☐ Ikke mit område☐ Other...

### 3 Kontrol af kølevæske leveringstemperatur \*

☐ Level 0: Konstant temperatur kontrol. Det kolde vand er kontrolleret til en fast temperatur eller ikke k...☐ Level 1: Udendørs temperatur/vejr-kompenseret kontrol. Væsketemperaturen er kontrolleret afhængi...☐ Level 2: Forbrugsbaseret kontrol. Det kolde vand er kontrolleret baseret på forbrug og varmekoefficient...☐ Ved ikke / Har ikke informationer nok☐ Ikke mit område☐ Other...

### 4 Kontrol af distributionspumper i netværket \*

☐ Level 0: Ingen automatisk kontrol. Distributionspumper er ikke kontrolleret.☐ Level 1: Automatisk tænd/sluk kontrol. Pumpen kører enten ved maksimal hastighed eller slet ikke.☐ Level 2: Fler-stadie kontrol. Hastigheden på pumpen kan køre i flere stadier.☐ Level 3: Variable hastighedskontrol. Hastigheden på pumpen er afhængig af flere stadier i systemet.☐ Ved ikke / Har ikke informationer nok☐ Ikke mit område☐ Other...

### 5 Kontrol af kølingsdistribution \*

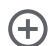

- ☐ Level 1: Automatisk kontrol med fast tidsplan (udfra driftstimer)
- ☐ Level 2: Automatisk kontrol med optimal tænd/sluk. Kontrollen er baseret på en kontinuerlig optimer...
- ☐ Level 3: Automatisk kontrol med forbrugsevaluering. Kontrollen er udelukkende baseret på forbruget.
- ☐ Ved ikke / Har ikke informationer nok
- ☐ Ikke mit område
- ☐ Other...

#### 6 Kontrol af driften af termisk energilager \*

- ☐ Level 0: Kontinuerlig lagring
- ☐ Level 1: Tidsplans lagring, baseret på sensor indikeringer
- ☐ Level 2: Forbrug forudsigelsesbaseret lagring.
- ☐ Ved ikke / Har ikke informationer nok
- ☐ Ikke mit område
- ☐ Other...

#### 7 Kontrol af kølegenerator \*

- ☐ Level 0: Tænd/sluk kontrol. Køler operere kontinuerligt og er kontrolleret af tænd/sluk.
- ☐ Level 1: Kontrol afhængig af udendørstemperatur.
- ☐ Level 2: Fler-stadiet kontrol afhængig af forbrug eller belastning.
- ☐ Level 3: Variabel kontrol afhængig af forbrug eller belastning.
- ☐ Level 4: Samme som level 3, inklusiv eksterne signaler fra netværket (f.eks. tariffer, tilgængelighed a...

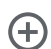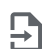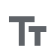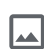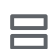

☐ Ikke mit område☐ Other...

### 8 Sekventering af kølegeneratorer \*

☐ Level 0: Prioritering er baseret på driftstimer (til optimering af vedligeholdelse)☐ Level 1: Kontrol baseret på en fast prioriteringsliste (ud fra energieffektiviteten)☐ Level 2: Kontrol baseret på en dynamisk prioriteringsliste, ud fra belastning, energieffektiviteten og k...☐ Level: 3: Samme som level 2, inklusiv forudsigelse af forbrug, effektiviteter og kapaciteter.☐ Level 4: Samme som level 3, inklusiv eksterne signaler fra netværket.☐ Ved ikke / Har ikke informationer nok☐ Ikke mit område☐ Other...

### 9 Rapporteringsinformation om præstationen af kølesystemet \*

☐ Level 0: Ingen rapportering.☐ Level 1: Central eller fjern-rapportering af nuværende præstation/ydeevne (tal såsom temperaturer og ...☐ Level 2: Samme som level 1, inklusiv rapportering af historisk data.☐ Level 3: Samme som level 2, inklusiv prognoser og præstationsevaluering (f.eks. indeklima)☐ Level 4: Samme som level 3, inklusiv fejlregistrering og forudsigende vedligeholdelse.☐ Ved ikke / Har ikke informationer nok☐ Ikke mit område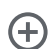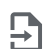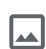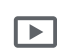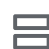

### 10 Detaljeret overvågning \*

- ☐ Level 0: Ikke implementeret.
- ☐ Level 1: Detaljeret overvågning af mindre end 50% af relevante køleforbrug.
- ☐ Level 2: Detaljeret overvågning af 50-90% af relevante køleforbrug.
- ☐ Ved ikke / Har ikke informationer nok
- ☐ Ikke mit område
- ☐ Other...

### 11 Kølesystemets interaktion med netværket \*

- ☐ Level 0: Ingen automatisk kontrol.
- ☐ Level 1: Planlagt kontrol.
- ☐ Level 2: Selvlærende optimeret kontrol
- ☐ Level 3: Optimeret kontrol baseret på eksterne signaler eller lokale forudsigelser
- ☐ Ved ikke / Har ikke informationer nok
- ☐ Ikke mit område
- ☐ Other...

After section 4 Continue to next section

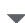

Section 5 of 9

## Ventilation

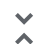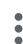

### 1 Kontrol af luft på rumniveau \*

- ☐ Level 0: Ingen kontrol. Systemet kører konstant eller er kontrolleret manuelt.
- ☐ Level 1: Tidsplanskontrol. Systemet kører afhængig af en givet tidsplan.
- ☐ Level 2: Tilstedeværelseskontrol. Systemet kører afhængig af tilstedeværelse.
- ☐ Level 3: Central kontrol, baseret på luftkvalitets sensorer (f.eks. CO2, luftfugtighed osv.)
- ☐ Level 4: Kontrol på rum/zone niveau, baseret på luftkvalitets sensorer (f.eks. CO2, luftfugtighed osv.)
- ☐ Ved ikke / Har ikke informationer nok
- ☐ Ikke mit område
- ☐ Other...

### 2 Udendørs luftstrøm eller udblæsnings luftstrøm \*

- ☐ Level 0: Ingen eller fast luftstrøm.
- ☐ Level 1: Kontrol baseret på en tidsplan, luftstrømmen er justeret i stadier.
- ☐ Level 2: Kontrol afhængig af tilstedeværelse (f.eks. luftstrømmen øges når der er nogen tilstede i ru...
- ☐ Level 3: Variabel kontrol, baseret på sensorer til optimal luftkvalitet.
- ☐ Ved ikke / Har ikke informationer nok
- ☐ Ikke mit område
- ☐ Other...

### 3 Håndtering af luftstrømskontrol \*

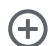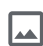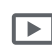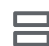

- ☐ Level 1: Tænd/sluk kontrol. Systemet kører kontinuerligt, og forsyner rum med maks styrke når rum...
- ☐ Level 2: Fler-stadie kontrol. Luftstrømmen er kontrolleret i stadier (f.eks. nedsættes funktionen i mid...
- ☐ Level 3: Automatisk luftstrøm eller tryk kontrol. Systemet afhænger af forbruget i de forbundne rum.
- ☐ Ved ikke / Har ikke informationer nok
- ☐ Ikke mit område
- ☐ Other...

#### 4 Kontrol af overophedning af varmegenvinding \*

- ☐ Level 0: Ingen overophedningskontrol. Ingen kontrol af varmegenvindingssystemet for at undgå over...
- ☐ Level 1: Automatisk kontrol, som forhindrer at varmegenvindingssystemet overopheder indblæsning...
- ☐ Ved ikke / Har ikke informationer nok
- ☐ Ikke mit område
- ☐ Other...

#### 5 Kontrol af isning af varmegenvinding \*

- ☐ Level 0: Ingen kontrol af varmegenvindingssystemet i situationer med iskolde forhold ved indblæsnin...
- ☐ Level 1: Automatisk kontrol. Systemet undgår at indblæsningsluften er iskold.
- ☐ Ved ikke / Har ikke informationer nok
- ☐ Ikke mit område
- ☐ Other...

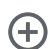

- ☐ Level 0: Ingen automatisk kontrol. Indblæsningsluften er leveret kontinuerligt afhængig af the maksi...
- ☐ Level 1: Fast temperatur kontrolleret manuelt.
- ☐ Level 2: Variabel temperatur, hvor kontrollen er afhængig af udendørstemperatur.
- ☐ Level 3: Variabel temperatur, hvor kontrollen er afhængig af forbrugen i rummet.
- ☐ Ved ikke / Har ikke informationer nok
- ☐ Ikke mit område
- ☐ Other...

#### 7 Fri mekanisk køling \*

- ☐ Level 0: Ingen automatisk kontrol
- ☐ Level 1: Nattekøling, hvor mængden af luft udefra er sat til maks i løbet af timer hvor bygningen ikke...
- ☐ Level 2: Fri køling. Luften er altid moduleret, for at minimere mængden af mekanisk køling. Udregnin...
- ☐ Level 3: H,x køling. Luften er altid moduleret, for at minimere mængden af mekanisk køling. Udregni...
- ☐ Ved ikke / Har ikke informationer nok
- ☐ Ikke mit område
- ☐ Other...

#### 8 Kontrol af luftfugtighed \*

- ☐ Level 0: Ingen automatisk kontrol. Luftfugteren/Affugteren kører konstant eller er manuelt tændt/slu...
- ☐ Level 1: Dugpunktskontrol, baseret på temperaturen for duggen og en genopvarmning af inddblæsni...
- ☐ Level 2: Direkte dug kontrol af rum, gennem indblæsningsluften.

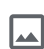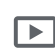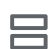



☐ Ikke mit område

☐ Other...

### 9 Rapporteringsinformation omkring indeklima \*

☐ Level 0: Ingen rapportering.

☐ Level 1: Realtidsovervågning af luftkvalitet (f.eks. ved brug af CO2)

☐ Level 2: Samme som level 1, inklusiv historiske data omkring indeklima.

☐ Level 3: Samme som level 2, inklusiv advarsler om vedligeholdelse eller brugerhandlinger (f.eks. åbn...

☐ Ved ikke / Har ikke informationer nok

☐ Ikke mit område

☐ Other...

### 10 Rapporteringsinformation omkring ventilationssystemet \*

☐ Level 0: Ingen rapportering.

☐ Level 1: Central eller fjernrapportering af nuværende præstation (f.eks. temperaturer eller energiforbr...

☐ Level 2: Samme som level 1, inklusiv rapportering af historiske data.

☐ Level 3: Samme som level 2, inklusiv forudsigelser omkring præstationsevaluering (f.eks. af indekli...

☐ Level 4: Samme som level 3, fejlregistrering og forudsigelse af vedligeholdelse.

☐ Ved ikke / Har ikke informationer nok

☐ Ikke mit område

☐ Other...

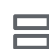

After section 5

Continue to next section

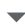

Section 6 of 9

# Lys

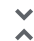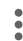

Description (optional)

## 1 Kontrol af lys \*

- ☐ Level 0: Manuel tænd/sluk kontakt.
- ☐ Level 1: Samme som level 0, inklusiv automatisk planlagt slukning af lys for at undgå unødigt forbrug...
- ☐ Level 2: Automatisk tænd/sluk, baseret på bevægelse.
- ☐ Ved ikke / Har ikke informationer nok
- ☐ Ikke mit område
- ☐ Other...

## 2 Kontrol af kunstig belysning baseret på dagslys \*

- ☐ Level 0: Manuel central control. Ingen automatisk kontrol til at tage hensyn til dagslys.
- ☐ Level 1: Manuel rum/zone kontrol. Ingen automatisk kontrol til at tage hensyn til dagslys.
- ☐ Level 2: Automatisk kontrol med en lyssensor. Lysintensiteten nedsættes hvis der er meget sollys.
- ☐ Ved ikke / Har ikke informationer nok
- ☐ Ikke mit område
- ☐ Other...



## Section 7 of 9

# Dynamisk klimaskærm

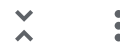

Description (optional)

## 1 Kontrol af persienner \*

- ☐ Level 0: Manuelle persienner.
- ☐ Level 1: Motoriseret persienner med manuel kontrol.
- ☐ Level 2: Motoriseret persienner med automatisk kontrol baseret på sensor data.
- ☐ Level 3: Kombineret lys/persienne/HVAC (heat, ventilation and air-conditioning) kontrol.
- ☐ Level 4: Persiennerne er styret baseret på forudsigelse af solindfald.
- ☐ Ved ikke / Har ikke informationer nok
- ☐ Ikke mit område
- ☐ Other...

## 2 Kontrol af vinduer \*

- ☐ Level 0: Manuel åbne/lukke eller kun faste vinduer.
- ☐ Level 1: Åbne/lukke observation, til styring af relevante systemer (f.eks. slukke varme, ventilation ell...
- ☐ Level 2: Samme som level 1, inklusiv automatisk mekanisk åbning af vinduer, baseret på sensor data.
- ☐ Level 3: Samme som level 2, inklusiv centraliseret koordinering af styret vinduer.
- ☐ Ved ikke / Har ikke informationer nok
- ☐ Ikke mit område

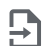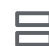

### 3 Smart vinduer \*

- ☐ Level 0: Individuel kontrol af vinduer
- ☐ Level 1: Automatisk kontrol.
- ☐ Level 2: Integreret kontrol med andre systemer såsom varme og lys.
- ☐ Ved ikke / Har ikke informationer nok
- ☐ Ikke mit område
- ☐ Other...

### 4 Raportering \*

- ☐ Level 0: Ingen rapportering
- ☐ Level 1: Rapportering af produkters position og fejlregistrering.
- ☐ Level 2: Samme som level 1, inklusiv forudsigelse af vedligeholdelse
- ☐ Level 3: Samme som level 2, inklusiv sensor data i realtid (f.eks. wind, temperatur osv.)
- ☐ Level 4: Samme som level 3, inklusiv historisk data for sensorer
- ☐ Ved ikke / Har ikke informationer nok
- ☐ Ikke mit område
- ☐ Other...

After section 7 Continue to next section

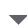

Section 8 of 9

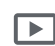

Description (optional)

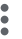

### 1 Lager af lokalt genereret elektricitet \*

- ☐ Level 0: Intet lager
- ☐ Level 1: El-lager på stedet (f.eks. batterilager)
- ☐ Level 2: Samme som level 1, inklusiv optimering omkring brug af den lokaltproduceret el, baseret på ...
- ☐ Level 3: Samme som level 2, inklusiv mulighed for at lagre til salg til netværket.
- ☐ Ved ikke / Har ikke informationer nok
- ☐ Ikke mit område
- ☐ Other...

### 2 Optimering af lokalt genereret elektricitet \*

- ☐ Level 0: Ingen optimering.
- ☐ Level 1: Planlagt elforbrug.
- ☐ Level 2: Automatiseret styring baseret på nuværende produktion af vedvarende energi.
- ☐ Level 3: Samme som level 2, inklusiv optimering baseret på forudsagt energiforbrug.
- ☐ Ved ikke / Har ikke informationer nok
- ☐ Ikke mit område
- ☐ Other...

### 3 Kontrol af lokalt genereret elektricitet \*

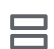

- ☐ Level 1: Kontrol påvirket af tilgængeligheden af vedvarende energi, hvor overproduktion er solgt til el...
- ☐ Level 2: Samme som level 1, inklusiv kontrol baseret på eksterne signaler fra elnettet.
- ☐ Ved ikke / Har ikke informationer nok
- ☐ Ikke mit område
- ☐ Other...

#### 4 Rapporteringsinformation omkring lokal generering og lager \*

- ☐ Level 0: Ingen rapportering.
- ☐ Level 1: Rapportering af aktuel generering og ladningstilstandsdata givet.
- ☐ Level 2: Samme som level 1, inklusiv historisk data.
- ☐ Level 3: Samme som level 2, inklusiv forudsigelse af præstationsevaluering.
- ☐ Level 4: Samme som level 3, inklusiv fejlregistrering og forudsigelse af vedligeholdelse.
- ☐ Ved ikke / Har ikke informationer nok
- ☐ Ikke mit område
- ☐ Other...

#### 5 Rapporteringsinformation omkring elektricitetsproduktion \*

- ☐ Level 0: Ingen rapportering
- ☐ Level 1: Aktuel elforbrug på bygningsniveau.
- ☐ Level 2: Tilbage meldinger i realtid på bygningsniveau.
- ☐ Level 3: Tilbage meldinger i realtid på apparat niveau.



- ☐ Ved ikke / Har ikke informationer nok
- ☐ Ikke mit område
- ☐ Other...

#### 6 Opladning af elbiler \*

- ☐ Level 0: Ikke muligt. Der er ingen parkeringspladser decideret til elbiler.
- ☐ Level 1: Muligt. Der er parkeringspladser med mulighed for opladning.
- ☐ Ved ikke / Har ikke informationer nok
- ☐ Ikke mit område
- ☐ Other...

#### 7 Rapporteringsinformation omkring opladning af elbiler \*

- ☐ Level 0: Ingen rapportering.
- ☐ Level 1: Information om opladningsstatus af bil til ejer
- ☐ Level 2: Samme som level 1, inklusiv automatisk identifikation og godkendelse af føreren til ladestat...
- ☐ Ved ikke / Har ikke informationer nok
- ☐ Ikke mit område
- ☐ Other...

#### 8 Detaljeret overvågning \*

- ☐ Level 0: Ikke implementeret.

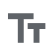

☐ Level 2: Detaljeret overågning af 50-90% af relevante elforbrug.

☐ Ved ikke / Har ikke informationer nok

☐ Ikke mit område

☐ Other...

## 9 Interaktion med elnettet \*

☐ Level 0: Ingen automatisk kontrol.

☐ Level 1: Planlagt interaktion (f.eks. tidsplan)

☐ Level 2: Selvlærende optimal kontrol baseret på nuværende vedvarende energi tilgængelighed.

☐ Level 3: Optimeret kontrol baseret på eksterne signaler eller lokale forudsigelser (f.eks. gennem styr...

☐ Ved ikke / Har ikke informationer nok

☐ Ikke mit område

☐ Other...

After section 8 Continue to next section

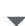

Section 9 of 9

# Overvågning og kontrol

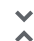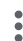

Description (optional)

## 1 Opvarmning og køling sammentidig \*

☐ Level 0: Der er mulighed for at have opvarmning og køling på samme tid. Systemerne er kontrolleret ...

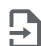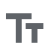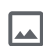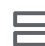



- ☐ Level 2: Opvarmning og køling sammentidig er ikke muligt. Der er kontrol som sørger for at det ikke ...
- ☐ Ved ikke / Har ikke informationer nok
- ☐ Ikke mit område
- ☐ Other...

## 2 Styring af varme sætpunkt \*

- ☐ Level 0: Manuel styring rum for rum.
- ☐ Level 1: Tilpasning fra en central lokation, hvor styringen foregår.
- ☐ Level 2: Samme som level 1, inklusiv brugerstyret planlagte tider, hvor rummet ikke er i brug.
- ☐ Ved ikke / Har ikke informationer nok
- ☐ Ikke mit område
- ☐ Other...

## 3 Styring af køle sætpunkt \*

- ☐ Level 0: Manuel styring rum for rum.
- ☐ Level 1: Tilpasning fra en central lokation, hvor styringen foregår.
- ☐ Level 2: Samme som level 1, inklusiv brugerstyret planlagte tider, hvor rummet ikke er i brug.
- ☐ Ved ikke / Har ikke informationer nok
- ☐ Ikke mit område
- ☐ Other...

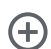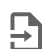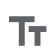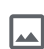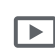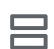

- ☐ Level 0: Ingen styring.
- ☐ Level 1: Delvis styring af varme/køle veksling i bygningen eller mellem bygninger.
- ☐ Level 2: Alle optaget områder har styring af varme/køle veksling i bygningen eller mellem bygninger.
- ☐ Ved ikke / Har ikke informationer nok
- ☐ Ikke mit område
- ☐ Other...

#### 5 HVAC (heat, ventilation and air conditioning) driftstid \*

- ☐ Level 0: Manuel styring. Ingen automatisk kontrol.
- ☐ Level 1: Varme og køle produktionsenheder følger en tidsplan med tænd/sluk.
- ☐ Level 2: Kontrol af varme og køle produktionsenheder er baseret på forbrug.
- ☐ Level 3: Samme som level 2, inklusiv forudsigelse af vedligeholdelse og eksterne signaler fra netvær...
- ☐ Ved ikke / Har ikke informationer nok
- ☐ Ikke mit område
- ☐ Other...

#### 6 Fejlregistrering og diagnostisering \*

- ☐ Level 0: Ingen central fejlregistrering. Ingen indikationer af fejl eller alarmer.
- ☐ Level 1: Delvis bygningsfejlregistrering. Indikering af fejl og alarmer af nogle systemer i bygningen.
- ☐ Level 2: Fuld bygningsfejlregistrering. Indikering af fejl og alarmer af alle systemer i bygningen.
- ☐ Level 3: Samme som level 2, inklusiv diagnostisering til at fastsætte hvilken type fejl der sker.

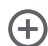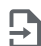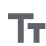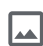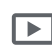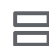

☐ Ikke mit område

☐ Other...

### 7 Styring af tilstedeværelse \*

☐ Level 0: Ingen styring.

☐ Level 1: Styring af tilstedeværelse i forbindelse med individuelle funktioner (f.eks. lys).

☐ Level 2: Central styret tilstedeværelse som bruges til flere bygningssystemer (f.eks. varme, lys og ven...

☐ Ved ikke / Har ikke informationer nok

☐ Ikke mit område

☐ Other...

### 8 Smart grid integrering \*

☐ Level 0: Ingen smart grid integrering. Bygningen arbejder uafhængigt af belastningen på nettet.

☐ Level 1: Efterspørgselsstyring mulig for nogle individuelle bygningsfunktioner. Ikke koordineret over ...

☐ Level 2: Samme som level 1, inklusiv styring koordineret over forskellige domæner til forskellige syst...

☐ Ved ikke / Har ikke informationer nok

☐ Ikke mit område

☐ Other...

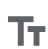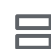

Supplement: s1 [file s1]
